# Supplementary material for: Microwave-assisted xylanase reaction: impact in the production of prebiotic xylooligosaccharides
Source: Royal Society of Chemistry journal article supplement (doi:10.1039/d1ra00449b), 2021-01-01
Supplement: d1ra00449b1.pdf [file d1ra00449b1.pdf]

1 **Supplementary information**  
2 **Microwave-assisted xylanase reaction: the impact in the production of**  
3 **prebiotic xylooligosaccharides**

4  
5 Hugo Mobarec<sup>1,3</sup>, Rodrigo Villagomez<sup>2</sup>, Eva Nordberg Karlsson<sup>1</sup>, Javier A. Linares-Pastén<sup>1,\*</sup>

6  
7 <sup>1</sup> Lund University, Division of Biotechnology, Department of Chemistry, Lund, Sweden

8 <sup>2</sup> Lund University, Centre for Analysis and Synthesis, Lund University, Lund, Sweden

9 <sup>3</sup> Technical University of Denmark, Department of Chemical and Biochemical Engineering, Copenhagen,  
10 Denmark

11  
12 \*Corresponding author: J. A. Linares-Pastén

13 (e-mail: [javier.linares\\_pasten@biotek.lu.se](mailto:javier.linares_pasten@biotek.lu.se))

14

15

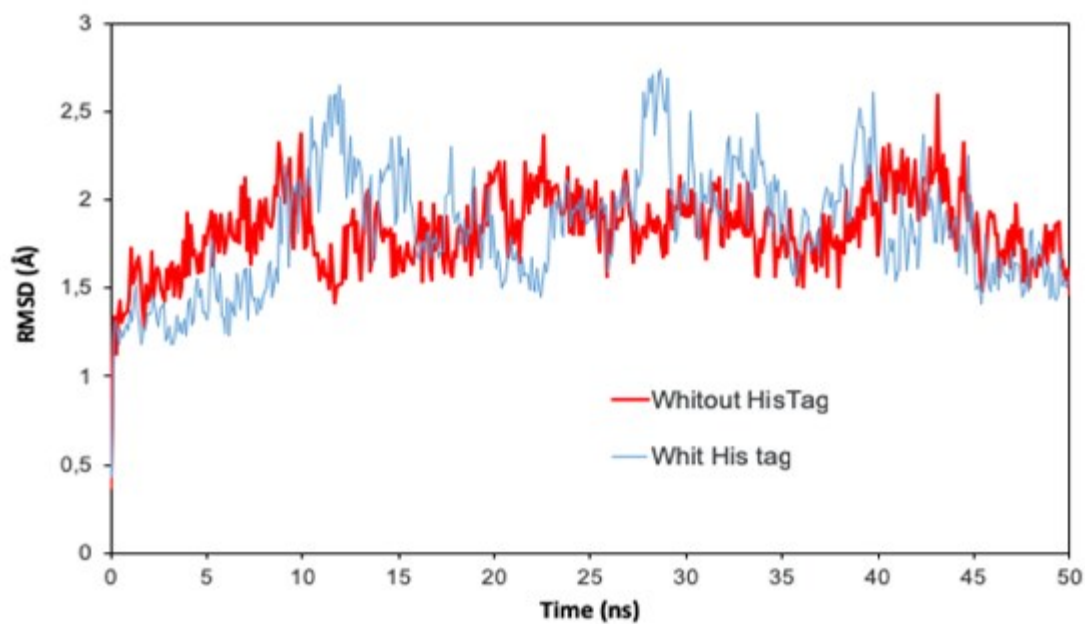

16

17 Figure 1S. Root-mean-square-deviations (RMSD) of the complex *BhXyn10AH*/ligands with and without  
18 6x C-histidine tag.

19

20

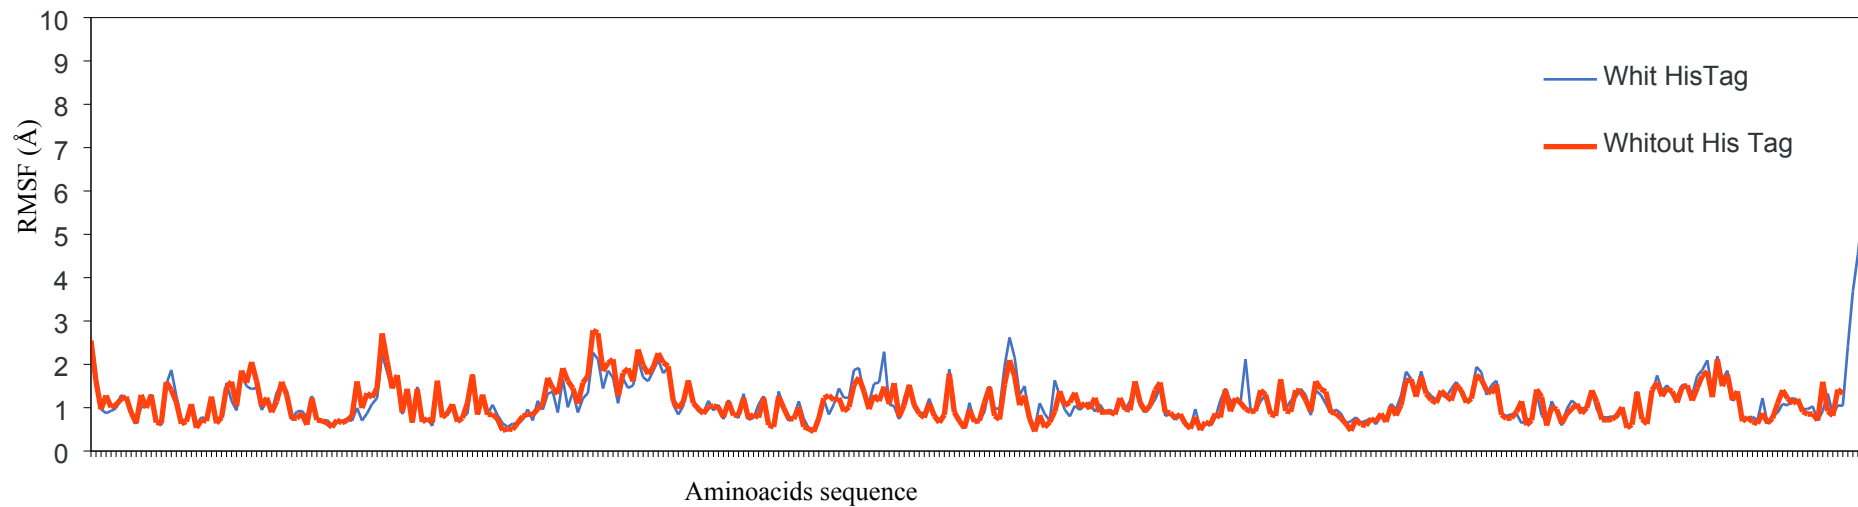

21  
22

23 Figure 2S. Root-mean-square-fluctuations (RMSF) of the complex *BhXyn10AH*/ligands obtained by molecular dynamic simulations during 50 ns. Comparison of structures  
24 with and without 6x C-histidine tag. Notice that the histidine tag is very flexible.

25
